# Supplementary material for: Inhibition of the activity of HIV-1 protease through antibody binding and mutations probed by molecular dynamics simulations
Source: PubMed Central journal article supplement (PMC7098958; doi:10.1038/s41598-020-62423-y), 2020-03-26
Supplement: 41598_2020_62423_MOESM1_ESM.pdf [file 41598_2020_62423_MOESM1_ESM.pdf]

## **Supporting information**

for

### **Inhibition of the activity of HIV-1 protease through antibody binding and mutations probed by molecular dynamics simulations**

Apoorva Badaya and Yellamraju U. Sasidhar

Department of Chemistry, Indian Institute of Technology Bombay, Powai, Mumbai 400076,  
India.

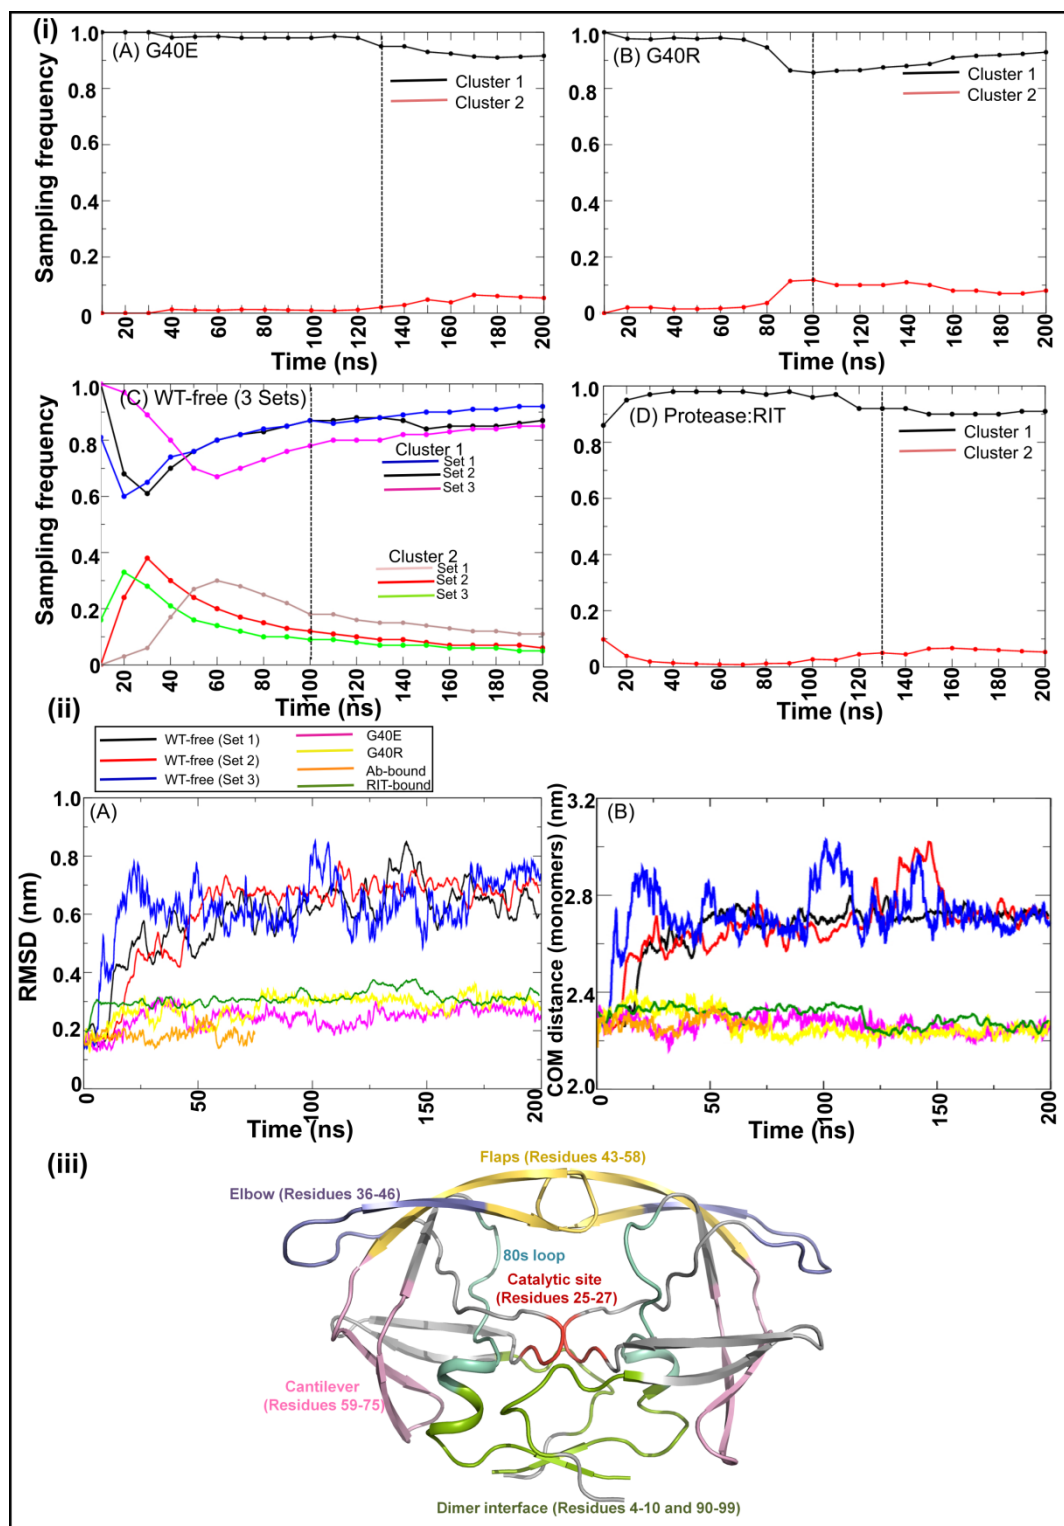

**Fig. S1** (i) The variation of sampling frequency of the first two most populated clusters (cluster 1 and 2) are determined for the (A) G40E, (B) G40R, (C) WT-free proteases and (D) Protease:RIT complex as a function of the simulation time (see **Methods**). (ii) The time variation of (A) RMSD with respect to the initial crystal structure conformation and (B) centre of mass (COM) distance between the monomers in the Ab-bound, RIT-bound, mutants and 3 sets of the WT-free proteases simulations. (iii) The functionally important regions of protease are highlighted on its crystal structure (PDB id: 1HXW).

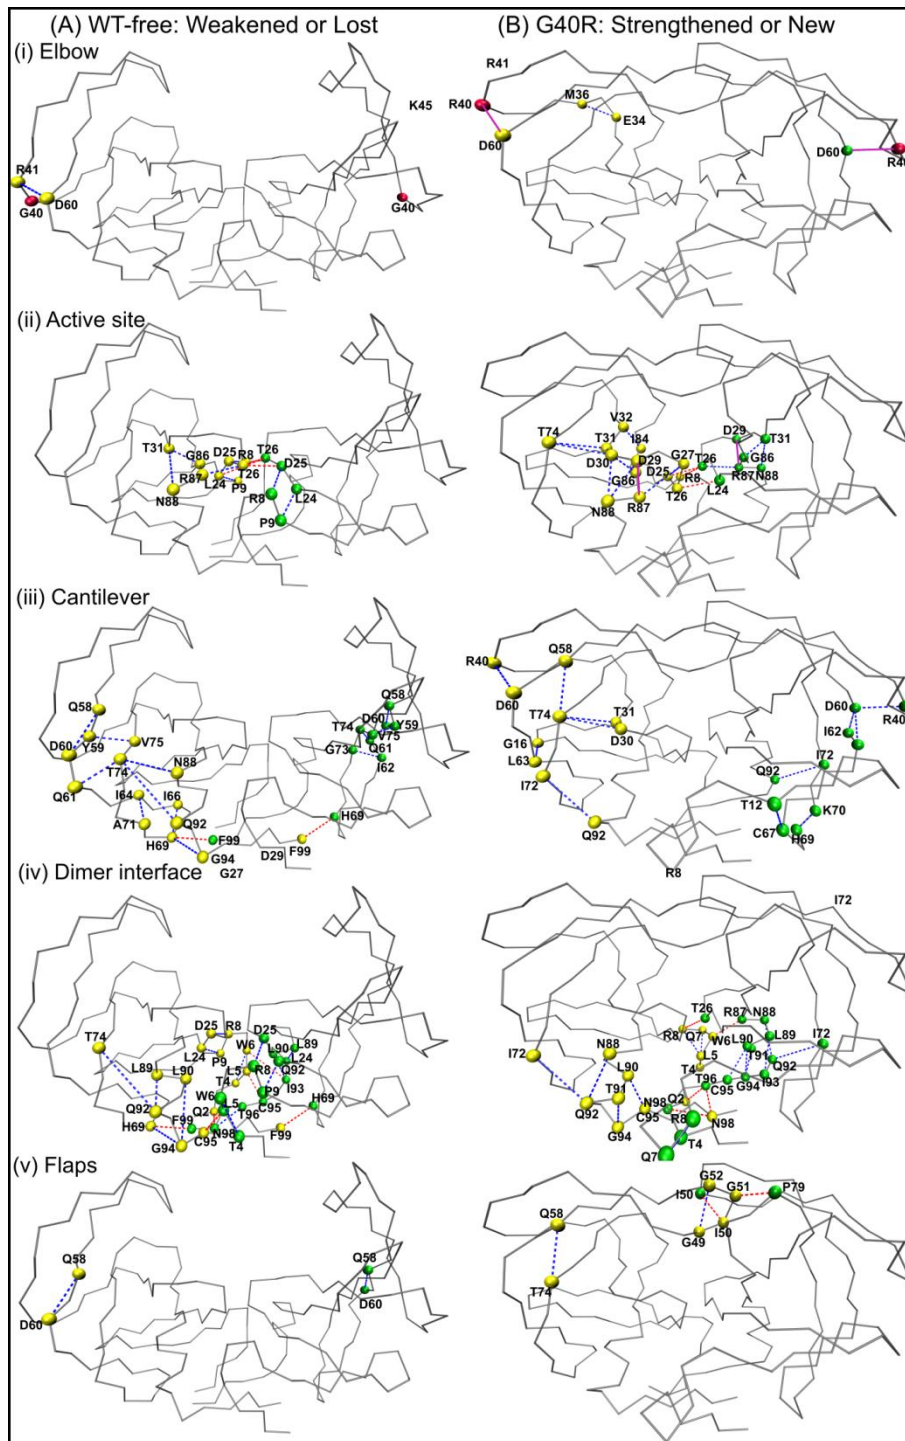

**Fig. S2** The representative structure of the (A) WT-free and (B) G40R proteases are shown in trace representation, highlighting and comparing the hydrogen-bonds and salt-bridges that are *weakened or lost* and *strengthened or new* (as explained in **Methods**) for the functionally important regions individually (i) Elbow, (ii), Active site (iii) Cantilever, (iv) Dimer interface and (v) Flaps. The C $\alpha$  atoms of the residues forming the hydrogen-bond are shown in spheres. The hydrogen-bonds within the monomers are shown as blue dashed line, inter-chain hydrogen-bonds are shown in red dashed-line and the salt-bridges are shown in pink solid line.

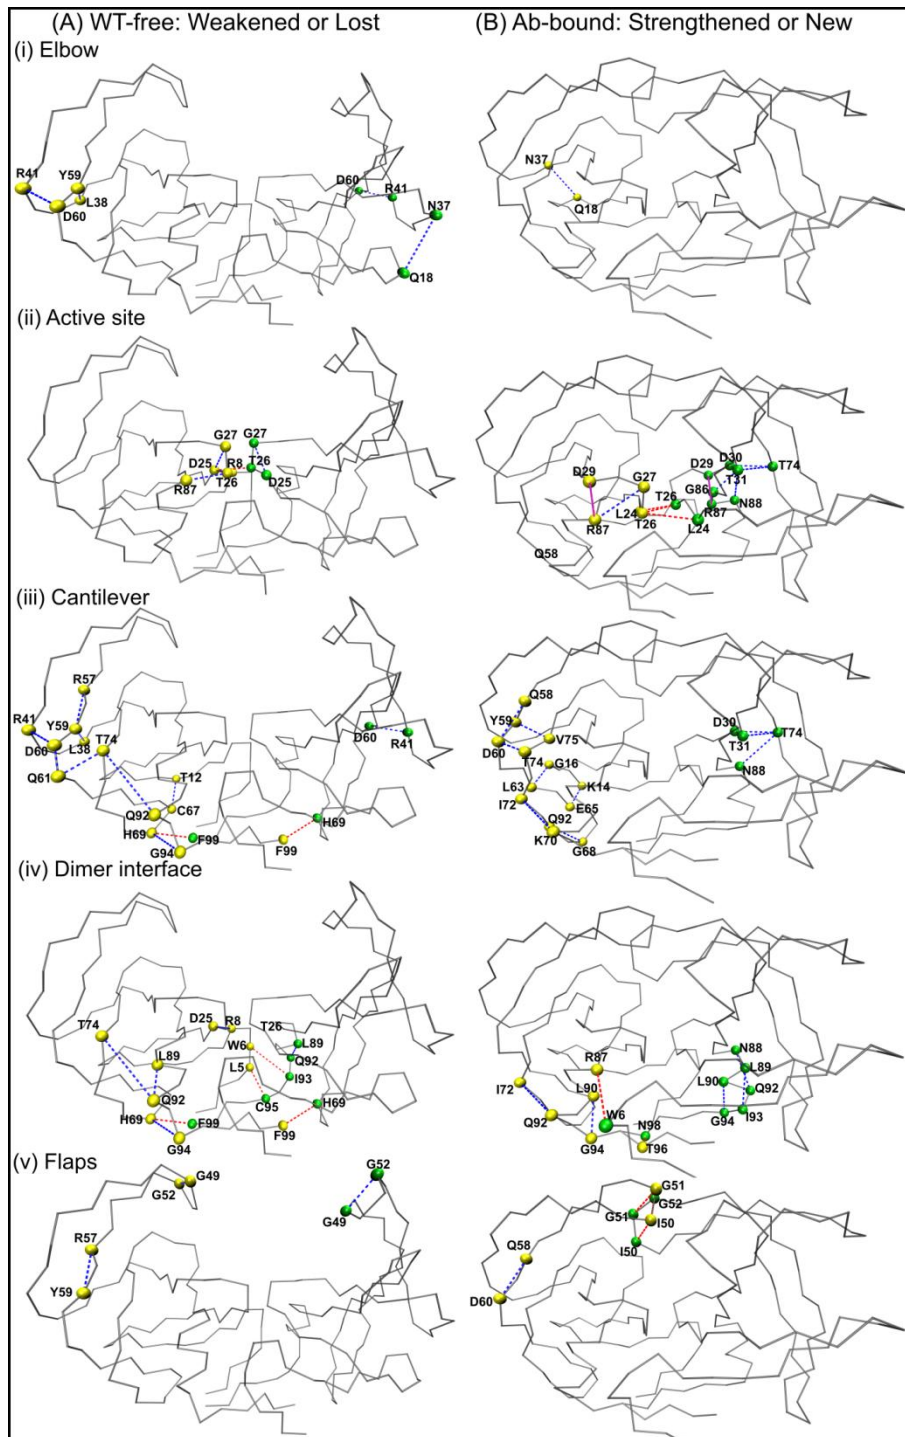

**Fig. S3** The representative structure of the (A) WT-free and (B) Ab-bound proteases are shown in trace representation, highlighting and comparing the hydrogen-bonds and salt-bridges that are *weakened or lost* and *strengthened or new* (as explained in **Methods**) for the functionally important regions individually (i) Elbow, (ii), Active site (iii) Cantilever, (iv) Dimer interface and (v) Flaps. The  $C\alpha$  atoms of the residues forming the hydrogen-bond are shown in spheres. The hydrogen-bonds within the monomers are shown as blue dashed line, inter-chain hydrogen-bonds interactions are shown in red dashed-line and the salt-bridges are shown in pink solid line.

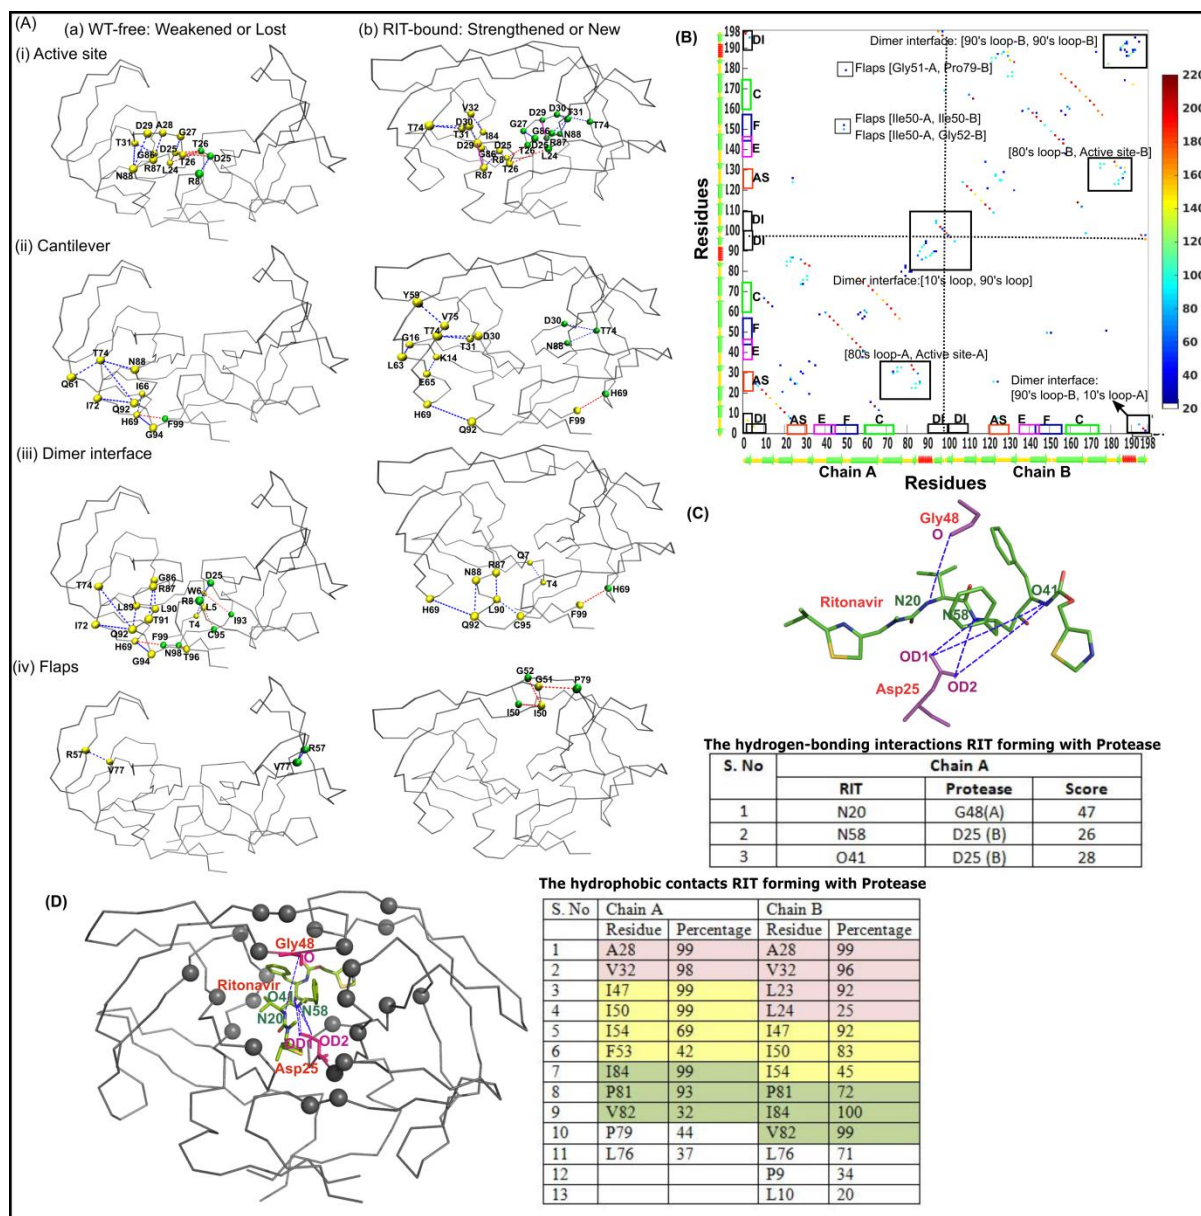

**Fig. S4** (A) The representative structure of the (a) WT-free and (b) RIT-bound proteases are shown in trace representation, highlighting and comparing the hydrogen-bonds and salt-bridges that are *weakened or lost* and *strengthened or new* (as explained in **Methods**) for the functionally important regions individually (i), Active site (ii) Cantilever, (iii) Dimer interface and (iv) Flaps. In elbow region no *strengthened or new* or *weakened or lost* interactions are observed. The Ca atoms of the residues forming the hydrogen-bond are shown in spheres. The hydrogen-bonds within the monomers are shown as blue dashed line, inter-chain hydrogen-bonds interactions are shown in red dashed-line and the salt-bridges are shown in pink solid line. (B) Hydrogen-bonding map computed from the equilibrated region of the trajectories of RIT-bound proteases. Only those hydrogen-bond pairs are shown, which are having a score more than 20. (C) The residues (shown in magenta) which are forming hydrogen-bonding interactions with RIT (shown in green) are shown in stick representation and the table below lists the atoms of RIT and residues of protease, which are involved in forming the hydrogen-bonding interactions and the corresponding hydrogen-bonding score is given. (D) The representative structure from the Protease:RIT complex simulation is shown, highlighting Ca atoms of the residues forming hydrophobic contacts with the RIT in sphere representation. The residues from protease and RIT involved in forming hydrogen-bonding

interactions are shown in stick representation. The table next to this lists the residues of protease, which are involved in forming hydrophobic contacts with RIT and also the percentage of time the contacts are observed. These residues belongs to active-site, flaps and 80s loop and are highlighted in red, yellow and green color respectively.

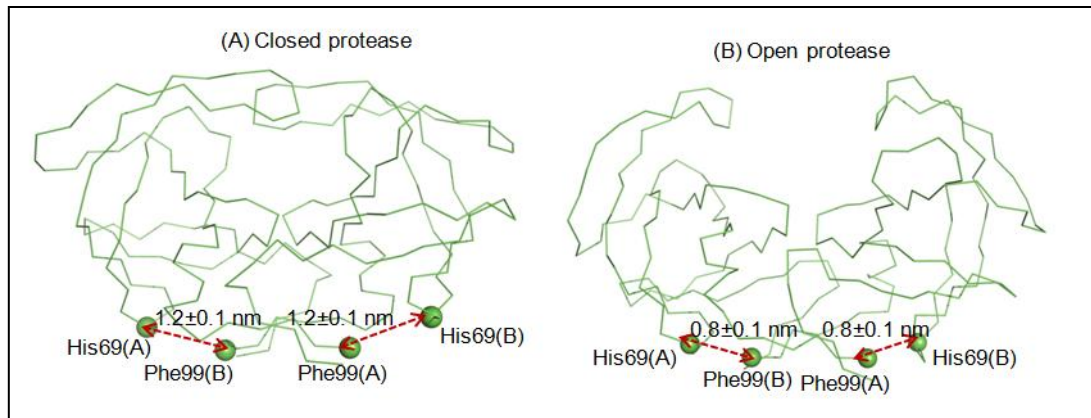

**Fig. S5** The distance between the two residues His69 in one chain (at the tip of cantilever) and Phe99 (the terminal residue) in the other chain of protease is assumed to be a reasonable metric to determine the downward motion of the cantilever, upon flap opening. (A) In both the chains of G40E and Ab-bound protease and chain B of G40R and RIT-bound protease this distance is  $1.2\pm 0.1$  nm and (B) in open WT-free protease this distance is  $0.8\pm 0.1$  nm.

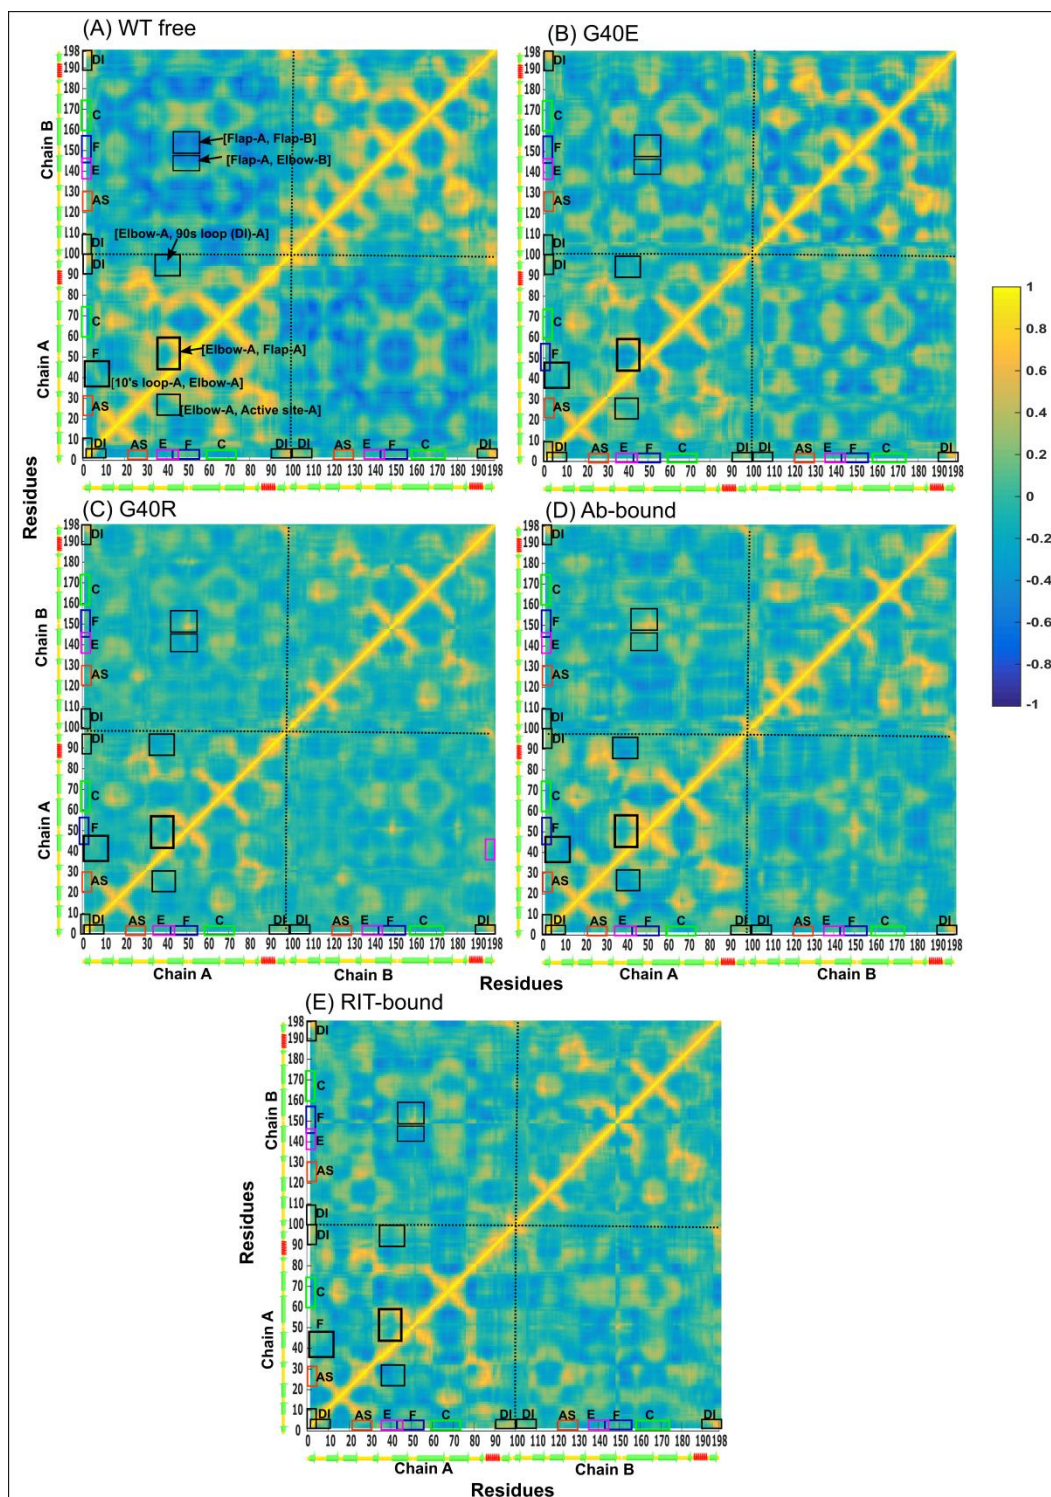

**Fig. S6** The cross-correlation plots for the (A) WT-free, (B) G40E, (C) G40R, (D) Ab-bound, (E) RIT-bound proteases obtained for the equilibrated regions of the trajectories. The values of cross-correlation coefficients for positively correlated motions are represented in green to yellow color and similarly the value of cross-correlation coefficients for the anti-correlated motions are represented in light blue to dark blue color. Some of the important highly correlated motions in WT-free protease are highlighted on the map for WT and these are attenuated in mutated, Ab/RIT-bound proteases. Please note that chain labels A and B are also marked. The important regions of protease such as dimer interface (DI), active site (AS), elbow (E), flaps (F) and cantilever (C) are marked on axes of the maps.

**Table S1:** Percentages of the hydrophobic contacts sampling, present in equilibrated region of the trajectories of mutants, Ab-bound and RIT-bound protease simulations, formed between the 80s loop and flaps (residues 43-58) (highlighted in blue) and between the flaps themselves (highlighted in red). Please note that in the WT-free protease there are hardly any hydrophobic contacts involving these regions.

| S. No. | <b>G40R</b>     |         | Percentage % | <b>G40E</b>      |         | Percentage % |
|--------|-----------------|---------|--------------|------------------|---------|--------------|
|        | Chain A         | Chain B |              | Chain A          | Chain B |              |
| 1      | Phe53           | Pro81   | 97           | Phe53            | Pro81   | 87           |
| 2      | Ile50           | Ile84   | 86           | Ile50            | Ile84   | 95           |
| 3      | Pro81           | Ile50   | 18           | Pro81            | Ile50   | 82           |
| 4      | Phe53           | Ile50   | 18           | Ile84            | Ile50   | 21           |
| 5      | Ile54           | Ile50   | 97           | Ile54            | Ile50   | 94           |
| 6      | Ile50           | Ile47   | 89           | Ile50            | Ile47   | 78           |
| 7      | Ile50           | Ile54   | 84           | Ile50            | Ile54   | 57           |
| 8      | Ile50           | Ile50   | 56           | Ile50            | Ile50   | 11           |
| 9      |                 |         |              | Ile47            | Ile50   | 16           |
|        |                 |         |              |                  |         |              |
| S. No. | <b>Ab-bound</b> |         | Percentage%  | <b>RIT-bound</b> |         | Percentage%  |
|        | Chain A         | Chain B |              | Chain A          | Chain B |              |
| 1      | Pro81           | Ile50   | 97           | Phe53            | Pro81   | 65           |
| 2      | Ile 84          | Ile 50  | 95           | Pro81            | Ile 50  | 59           |
| 3      | Pro81           | Phe53   | 42           | Ile54            | Ile50   | 88           |
| 4      | Ile 50          | Ile 84  | 14           | Ile50            | Ile50   | 75           |
| 5      | Ile 50          | Pro81   | 13           | Ile50            | Ile54   | 75           |
| 6      | Val82           | Ile 50  | 13           | Ile50            | Ile47   | 53           |
| 7      | Ile54           | Ile 50  | 96           |                  |         |              |
| 8      | Ile 50          | Ile54   | 87           |                  |         |              |
| 9      | Ile 50          | Ile 50  | 51           |                  |         |              |
| 10     | Ile47           | Ile 50  | 40           |                  |         |              |
| 11     | Ile 50          | Ile47   | 39           |                  |         |              |



**Table S2:** Observed percentages of the salt-bridges present in equilibrated regions of the trajectories of G40R, G40E, Ab-bound and RIT-bound proteases simulations. No salt-bridge sampling is observed in WT-free protease.

| Chain | <b>G40R</b>     |          | Percentage % | <b>G40E</b>      |          | Percentage % |
|-------|-----------------|----------|--------------|------------------|----------|--------------|
|       | Donor           | Acceptor |              | Donor            | Acceptor |              |
| A     | ASP29-OD1       | ARG87-NH | 60.00        | ASP29-OD1        | ARG87-NH | 57.00        |
| A     | ASP29-OD2       | ARG87-NH | 54.50        | ASP29-OD2        | ARG87-NH | 60.00        |
| B     | ASP29-OD1       | ARG87-NH | 19.00        | ASP29-OD1        | ARG87-NH | 50.00        |
| B     | ASP29-OD2       | ARG87-NH | 38.00        | ASP29-OD2        | ARG87-NH | 55.50        |
| A     | ASP60-OD1       | ARG40-NH | 23.00        | GLU40-OE1        | ARG41-NH | 11.00        |
| A     | ASP60-OD2       | ARG40-NH | 22.50        | GLU40-OE2        | ARG41-NH | 12.50        |
| A     | ASP60-OD1       | ARG40-NE | 8.00         | GLU40-OE1        | ARG41-NE | 10.00        |
| A     | ASP60-OD2       | ARG40-NE | 7.00         | GLU40-OE2        | ARG41-NE | 2.00         |
| B     | ASP60-OD1       | ARG40-NH | 34.00        | GLU40-OE1        | ARG41-NH | 5.50         |
| B     | ASP60-OD2       | ARG40-NH | 34.00        | GLU40-OE2        | ARG41-NH | 5.00         |
| B     | ASP60-OD1       | ARG40-NE | 8.00         | GLU40-OE1        | ARG41-NE | 8.00         |
| B     | ASP60-OD2       | ARG40-NE | 8.00         | GLU40-OE2        | ARG41-NE | 8.00         |
|       |                 |          |              |                  |          |              |
| Chain | <b>Ab-bound</b> |          | Percentage%  | <b>RIT-bound</b> |          | Percentage%  |
|       | Donor           | Acceptor |              | Donor            | Acceptor |              |
| A     | ASP29-OD1       | ARG87-NH | 74.00        | ASP29-OD1        | ARG87-NH | 28.00        |
| A     | ASP29-OD2       | ARG87-NH | 75.00        | ASP29-OD2        | ARG87-NH | 28.00        |
| B     | ASP29-OD1       | ARG87-NH | 45.50        | ASP29-OD1        | ARG87-NH | 20.00        |
| B     | ASP29-OD2       | ARG87-NH | 38.50        | ASP29-OD2        | ARG87-NH | 20.00        |
| B     | ASP29-OD1       | ARG87-NE | 17.50        |                  |          |              |
| B     | ASP29-OD2       | ARG87-NE | 12.00        |                  |          |              |

**Table S3:** The hydrogen-bonding scores of the *strengthened or new* hydrogen-bonding interactions in G40E with respect to WT-free protease obtained by subtracting the WT hydrogen-bonding map from the G40E hydrogen-bonding map (see **Methods** for definition of *strengthened or new* hydrogen-bonding interactions). The residue pairs forming the hydrogen-bonds in elbows, active-site, cantilever, dimer-interface and flaps are highlighted in gray, red, purple, green and yellow color respectively.

| S. No      | Chain A  |         |        | Chain B  |     |        |
|------------|----------|---------|--------|----------|-----|--------|
|            | Residues |         | Score  | Residues |     | Score  |
| 1          | E40      | R41     | 68.86  | E40      | R41 | 65.24  |
| 2          | E34      | M36     | 32.49  | E34      | M36 | 23.20  |
| 3          | D30      | T74     | 179.90 | D30      | T74 | 189.36 |
| 4          | D30      | N88     | 109.91 | D30      | N88 | 109.00 |
| 5          | D30      | G86     | 82.18  | D30      | G86 | 84.09  |
| 6          | T31      | T74     | 80.52  | T31      | T74 | 79.13  |
| 7          | G27      | R87     | 49.11  | R8       | L24 | 51.22  |
| 8          | V32      | I84     | 43.49  | V32      | I84 | 30.20  |
| 9          | R8       | L24     | 38.33  | D29      | R87 | 27.67  |
| 10         | D29      | N88     | 21.64  | D29      | N88 | 21.18  |
| 11         | I72      | Q92     | 106.86 | G27      | R87 | 21.83  |
| 12         | T4       | Q7      | 81.79  | D25      | G27 | 27.70  |
| 13         | N88      | Q92     | 66.01  | I66      | G68 | 20.31  |
| 14         | L90      | C95     | 42.83  | T12      | C67 | 20.21  |
| 15         | T91      | G94     | 35.75  | I72      | Q92 | 34.13  |
| 16         | G49      | G52     | 24.88  | I3       | L5  | 37.23  |
| 17         | T80      | V82     | 25.86  | T4       | Q7  | 57.90  |
| 18         |          |         |        | T4       | W6  | 23.92  |
| 19         |          |         |        | N88      | Q92 | 64.70  |
| 20         |          |         |        | L89      | I93 | 31.66  |
| 21         |          |         |        | L90      | C95 | 51.86  |
| 22         |          |         |        | T91      | G94 | 44.44  |
| 23         |          |         |        | L90      | G94 | 34.93  |
| 24         |          |         |        | Q58      | T74 | 23.59  |
| 25         |          |         |        | G49      | G52 | 20.00  |
| Interchain |          |         |        |          |     |        |
| S. No.     | Chain A  | Chain B | Score  |          |     |        |
| 1          | T26      | T26     | 55.49  |          |     |        |
| 2          | N98      | N98     | 56.38  |          |     |        |
| 3          | T96      | N98     | 42.66  |          |     |        |
| 4          | N98      | T96     | 28.18  |          |     |        |
| 5          | T96      | Q2      | 31.59  |          |     |        |
| 6          | P79      | G51     | 75.47  |          |     |        |
| 7          | G51      | P79     | 75.06  |          |     |        |
| 8          | I50      | I50     | 68.34  |          |     |        |

**Table S4:** The hydrogen-bonding scores of the *strengthened or new* hydrogen-bonding interactions in G40R with respect to WT-free protease obtained by subtracting the WT hydrogen-bonding map from the G40R hydrogen-bonding map (see **Methods** for definition of *strengthened or new* hydrogen-bonding interactions). The residue pairs forming the hydrogen-bonds in elbows, active-site, cantilever, dimer-interface and flaps are highlighted in gray, red, purple, green and yellow color respectively.

| S. No             | Chain A  |         |        | Chain B  |     |       |
|-------------------|----------|---------|--------|----------|-----|-------|
|                   | Residues |         | Score  | Residues |     | Score |
| 1                 | E34      | M36     | 31.36  | R40      | D60 | 40.75 |
| 2                 | R40      | D60     | 25.98  | T26      | R87 | 20.31 |
| 3                 | D25      | G27     | 29.18  | T31      | G86 | 56.65 |
| 4                 | G27      | R87     | 75.31  | T31      | N88 | 48.18 |
| 5                 | D29      | N88     | 30.85  | T12      | C67 | 20.00 |
| 6                 | D30      | T74     | 164.77 | D60      | I62 | 23.72 |
| 7                 | D30      | N88     | 97.30  | D60      | Q61 | 20.72 |
| 8                 | D30      | G86     | 58.56  | H69      | K70 | 20.75 |
| 9                 | D30      | T31     | 38.64  | I72      | Q92 | 26.01 |
| 10                | T31      | T74     | 47.98  | T4       | R8  | 91.42 |
| 11                | V32      | I84     | 36.85  | T4       | Q7  | 88.93 |
| 12                | G16      | L63     | 32.43  | N88      | Q92 | 21.63 |
| 13                | I72      | Q92     | 107.78 | L89      | I93 | 34.56 |
| 14                | T4       | Q7      | 107.89 | L90      | G94 | 48.71 |
| 15                | L5       | R8      | 87.15  | L90      | C95 | 28.65 |
| 16                | N88      | Q92     | 52.52  | T91      | G94 | 26.02 |
| 17                | L90      | C95     | 68.25  |          |     |       |
| 18                | T91      | G94     | 53.13  |          |     |       |
| 19                | G49      | G52     | 31.91  |          |     |       |
| 20                | Q58      | T74     | 25.33  |          |     |       |
| 21                | T80      | V82     | 27.57  |          |     |       |
| 22                | G86      | L89     | 23.57  |          |     |       |
| <b>Interchain</b> |          |         |        |          |     |       |
| S. No.            | Chain A  | Chain B | Score  |          |     |       |
| 1                 | R8       | T26     | 71.42  |          |     |       |
| 2                 | D25      | T26     | 161.91 |          |     |       |
| 3                 | T26      | L24     | 75.97  |          |     |       |
| 4                 | Q2       | T96     | 38.17  |          |     |       |
| 5                 | W6       | R87     | 23.02  |          |     |       |
| 6                 | R8       | T26     | 71.42  |          |     |       |
| 7                 | N98      | T96     | 30.38  |          |     |       |
| 8                 | N98      | N98     | 28.07  |          |     |       |
| 9                 | I50      | I50     | 75.70  |          |     |       |
| 10                | G51      | P79     | 39.84  |          |     |       |

**Table S5:** The hydrogen-bonding scores of the *strengthened or new* hydrogen-bonding interactions in Ab-bound protease with respect to WT-free protease obtained by subtracting the WT hydrogen-bonding map from the Ab-bound hydrogen-bonding map (see **Methods** for definition of *strengthened or new* hydrogen-bonding interactions). The residue pairs forming the hydrogen-bonds in elbows, active-site, cantilever, dimer-interface and flaps are highlighted in gray, red, purple, green and yellow color respectively.

| S. No             | Chain A  |         |       | Chain B  |     |        |
|-------------------|----------|---------|-------|----------|-----|--------|
|                   | Residues |         | Score | Residues |     | Score  |
| 1                 | Q18      | N37     | 64.79 | D29      | R87 | 26.10  |
| 2                 | G27      | R87     | 50.52 | D30      | T74 | 60.40  |
| 3                 | K14      | E65     | 36.69 | T31      | N88 | 115.46 |
| 4                 | G16      | L63     | 76.91 | T31      | G86 | 39.98  |
| 5                 | Y59      | V75     | 41.74 | T31      | T74 | 20.00  |
| 6                 | D60      | T74     | 21.68 | T74      | N88 | 43.95  |
| 7                 | G68      | K70     | 32.94 | N88      | Q92 | 20.49  |
| 8                 | I72      | Q92     | 27.62 | L89      | I93 | 26.01  |
| 9                 | L90      | G94     | 25.10 | L90      | G94 | 77.61  |
| 10                | Q58      | D60     | 74.87 | N88      | L89 | 22.10  |
| 11                | T80      | N83     | 60.98 |          |     |        |
| 12                | N88      | L89     | 20.23 |          |     |        |
| <b>Interchain</b> |          |         |       |          |     |        |
| S. No.            | Chain A  | Chain B | Score |          |     |        |
| 1                 | L24      | T26     | 42.71 |          |     |        |
| 2                 | T26      | T26     | 35.72 |          |     |        |
| 3                 | T26      | L24     | 31.37 |          |     |        |
| 4                 | R87      | W6      | 51.84 |          |     |        |
| 5                 | T96      | N98     | 27.10 |          |     |        |
| 6                 | I50      | I50     | 82.41 |          |     |        |
| 7                 | I50      | G52     | 26.07 |          |     |        |
| 8                 | G51      | G51     | 38.43 |          |     |        |

**Table S6:** The hydrogen-bonding scores of the *strengthened or new* hydrogen-bonding interactions in RIT-bound protease with respect to WT-free protease obtained by subtracting the WT hydrogen-bonding map from the RIT-bound protease hydrogen-bonding map (see **Methods** for definition of *strengthened or new* hydrogen-bonding interactions). The residue pairs forming the hydrogen-bonds in active-site, cantilever, dimer-interface and flaps are highlighted in red, purple, green and yellow color respectively.

| S. No             | Chain A  |         |        | Chain B  |     |       |
|-------------------|----------|---------|--------|----------|-----|-------|
|                   | Residues |         | Score  | Residues |     | Score |
| 1                 | D25      | R87     | 93.81  | T31      | N88 | 98.47 |
| 2                 | D30      | T74     | 86.16  | T31      | G86 | 37.25 |
| 3                 | D30      | T31     | 37.03  | G27      | D25 | 30.22 |
| 4                 | V32      | I84     | 35.52  | D30      | T74 | 21.07 |
| 5                 | T31      | T74     | 34.78  | T74      | N88 | 29.77 |
| 6                 | D30      | G86     | 63.70  | N88      | L89 | 28.64 |
| 7                 | H69      | Q92     | 22.28  |          |     |       |
| 8                 | G16      | L63     | 22.17  |          |     |       |
| 9                 | K14      | E65     | 21.57  |          |     |       |
| 10                | Y59      | V75     | 20.00  |          |     |       |
| 11                | T4       | Q7      | 144.01 |          |     |       |
| 12                | R87      | L90     | 84.50  |          |     |       |
| 13                | N88      | Q92     | 32.79  |          |     |       |
| 14                | L90      | C95     | 23.20  |          |     |       |
| 15                | G86      | N88     | 61.30  |          |     |       |
| <b>Interchain</b> |          |         |        |          |     |       |
| S. No.            | Chain A  | Chain B | Score  |          |     |       |
| 1                 | R8       | T26     | 88.63  |          |     |       |
| 2                 | T26      | L24     | 73.04  |          |     |       |
| 3                 | F99      | H69     | 24.97  |          |     |       |
| 4                 | I50      | I50     | 72.86  |          |     |       |
| 5                 | G52      | I50     | 29.84  |          |     |       |
| 6                 | G51      | P79     | 27.71  |          |     |       |

**Table S7:** The hydrogen-bonding scores of the *weakened or lost* hydrogen-bonding interactions in G40E with respect to WT-free protease obtained by subtracting the WT hydrogen-bonding map from the G40E hydrogen-bonding map (see **Methods** for definition of *weakened or lost* hydrogen-bonding interactions). The residue pairs forming the hydrogen-bonds in elbows, active-site, cantilever, dimer-interface and flaps are highlighted in gray, red, purple, green and yellow color respectively.

| S. No             | Chain A  |         |        | Chain B  |     |       |
|-------------------|----------|---------|--------|----------|-----|-------|
|                   | Residues |         | Score  | Residues |     | Score |
| 1                 | R41      | D60     | 50.34  | R41      | D60 | 37.62 |
| 2                 | T31      | N88     | 135.40 | T31      | N88 | 39.11 |
| 3                 | T31      | G86     | 93.13  | T31      | G86 | 30.75 |
| 4                 | T26      | R87     | 48.79  | T26      | R87 | 35.27 |
| 5                 | P9       | L24     | 73.86  | P9       | L24 | 70.34 |
| 6                 | R8       | D25     | 26.37  | R8       | D25 | 36.99 |
| 7                 | T74      | Q92     | 55.63  | I66      | H69 | 40.10 |
| 8                 | T74      | N88     | 44.04  | I64      | A71 | 30.10 |
| 9                 | H69      | G94     | 26.54  | I62      | G73 | 23.62 |
| 10                | I66      | H69     | 28.05  | Q61      | T74 | 21.42 |
| 11                | I64      | A71     | 29.17  | G16      | L63 | 23.03 |
| 12                | Q61      | T74     | 44.56  | T96      | N98 | 23.77 |
| 13                | T96      | N98     | 23.11  | L90      | I93 | 20.57 |
| 14                | L89      | Q92     | 19.79  | L89      | Q92 | 37.95 |
| 15                | Q58      | D60     | 38.61  | Q58      | D60 | 25.41 |
| <b>Interchain</b> |          |         |        |          |     |       |
| S. No.            | Chain A  | Chain B | Score  |          |     |       |
| 1                 | L24      | T26     | 39.39  |          |     |       |
| 2                 | F99      | H69     | 58.75  |          |     |       |
| 3                 | H69      | F99     | 22.58  |          |     |       |
| 4                 | N98      | Q2      | 28.73  |          |     |       |
| 5                 | C95      | L5      | 91.79  |          |     |       |
| 6                 | W6       | I93     | 21.1   |          |     |       |
| 7                 | L5       | C95     | 100.37 |          |     |       |
| 8                 | I3       | L97     | 29.63  |          |     |       |
| 9                 | Q2       | N98     | 34.96  |          |     |       |

**Table S8:** The hydrogen-bonding scores of the *weakened or lost* hydrogen-bonding interactions in G40R with respect to WT-free protease obtained by subtracting the WT hydrogen-bonding map from the G40R hydrogen-bonding map (see **Methods** for definition of *weakened or lost* hydrogen-bonding interactions). The residue pairs forming the hydrogen-bonds in elbows, active-site, cantilever, dimer-interface and flaps are highlighted in gray, red, purple, green and yellow color respectively.

| S. No             | Chain A  |         |        | Chain B  |     |       |
|-------------------|----------|---------|--------|----------|-----|-------|
|                   | Residues |         | Score  | Residues |     | Score |
| 1                 | R41      | D60     | 20.24  | R8       | D25 | 55.08 |
| 2                 | R8       | D25     | 32.55  | P9       | L24 | 95.19 |
| 3                 | P9       | L24     | 27.23  | I62      | G73 | 80.44 |
| 4                 | T26      | R87     | 29.45  | Q61      | T74 | 24.59 |
| 5                 | T31      | N88     | 135.40 | Y59      | V75 | 53.28 |
| 6                 | T31      | G86     | 87.71  | T4       | W6  | 21.79 |
| 7                 | T74      | Q92     | 55.63  | L89      | Q92 | 36.38 |
| 8                 | T74      | N88     | 44.04  | T96      | N98 | 24.17 |
| 9                 | H69      | G94     | 26.54  | L90      | I93 | 22.26 |
| 10                | I66      | H69     | 20.20  | Q58      | D60 | 29.38 |
| 11                | I64      | A71     | 20.24  |          |     |       |
| 12                | Q61      | T74     | 43.76  |          |     |       |
| 13                | Y59      | V75     | 21.87  |          |     |       |
| 14                | T4       | W6      | 23.80  |          |     |       |
| 15                | L89      | Q92     | 20.00  |          |     |       |
| 16                | L90      | G94     | 20.99  |          |     |       |
| 17                | Q58      | D60     | 41.98  |          |     |       |
| <b>Interchain</b> |          |         |        |          |     |       |
| S. No.            | Chain A  | Chain B | Score  |          |     |       |
| 1                 | L24      | T26     | 39.39  |          |     |       |
| 2                 | T26      | T26     | 136.26 |          |     |       |
| 3                 | T26      | D25     | 51.42  |          |     |       |
| 4                 | F99      | H69     | 29.01  |          |     |       |
| 5                 | H69      | F99     | 22.58  |          |     |       |
| 6                 | Q2       | N98     | 29.40  |          |     |       |
| 7                 | L5       | C95     | 70.40  |          |     |       |
| 8                 | W6       | I93     | 21.1   |          |     |       |

**Table S9:** The hydrogen-bonding scores of the *weakened or lost* hydrogen-bonding interactions in Ab-bound protease with respect to WT-free protease obtained by subtracting the WT hydrogen-bonding map from the Ab-bound hydrogen-bonding map (see **Methods** for definition of *weakened or lost* hydrogen-bonding interactions). The residue pairs forming the hydrogen-bonds in elbows, active-site, cantilever, dimer-interface and flaps are highlighted in gray, red, purple, green and yellow color respectively.

| S. No             | Chain A  |         |       | Chain B  |     |       |
|-------------------|----------|---------|-------|----------|-----|-------|
|                   | Residues |         | Score | Residues |     | Score |
| 1                 | R41      | D60     | 66.32 | R41      | D60 | 32.78 |
| 2                 | L38      | Y59     | 31.19 | Q18      | N37 | 27.09 |
| 3                 | R8       | D25     | 50.44 | D25      | G27 | 25.66 |
| 4                 | D25      | G27     | 46.87 | L89      | Q92 | 35.34 |
| 5                 | T26      | R87     | 29.75 | G49      | G52 | 42.04 |
| 6                 | T74      | Q92     | 55.63 |          |     |       |
| 7                 | D60      | Q61     | 47.89 |          |     |       |
| 8                 | T12      | C67     | 44.70 |          |     |       |
| 9                 | H69      | G94     | 26.54 |          |     |       |
| 10                | Q61      | T74     | 26.37 |          |     |       |
| 11                | L89      | Q92     | 20.72 |          |     |       |
| 12                | R57      | Y59     | 34.24 |          |     |       |
| 13                | G49      | G52     | 21.58 |          |     |       |
| <b>Interchain</b> |          |         |       |          |     |       |
| S. No.            | Chain A  | Chain B | Score |          |     |       |
| 1                 | D25      | T26     | 21.37 |          |     |       |
| 2                 | F99      | H69     | 41.36 |          |     |       |
| 3                 | H69      | F99     | 22.58 |          |     |       |
| 4                 | L5       | C95     | 45.36 |          |     |       |
| 5                 | W6       | I93     | 21.1  |          |     |       |



**Table S10:** The hydrogen-bonding scores of the *weakened or lost* hydrogen-bonding interactions in RIT-bound protease with respect to WT-free protease obtained by subtracting the WT hydrogen-bonding map from the RIT-bound hydrogen-bonding map (see **Methods** for definition of *weakened or lost* hydrogen-bonding interactions). The residue pairs forming the hydrogen-bonds in active-site, cantilever, dimer-interface and flaps are highlighted in red, purple, green and yellow color respectively.

| S. No      | Chain A  |         |        | Chain B  |     |       |
|------------|----------|---------|--------|----------|-----|-------|
|            | Residues |         | Score  | Residues |     | Score |
| 1          | T31      | N88     | 135.12 | R8       | D25 | 55.08 |
| 2          | A28      | R87     | 94.31  | R57      | V77 | 20.97 |
| 3          | T31      | G86     | 90.69  |          |     |       |
| 4          | D29      | N88     | 80.61  |          |     |       |
| 5          | D25      | G27     | 25.55  |          |     |       |
| 6          | I72      | Q92     | 74.59  |          |     |       |
| 7          | T74      | Q92     | 55.63  |          |     |       |
| 8          | T74      | N88     | 44.04  |          |     |       |
| 9          | Q61      | T74     | 41.73  |          |     |       |
| 10         | H69      | G94     | 26.54  |          |     |       |
| 11         | I66      | H69     | 19.98  |          |     |       |
| 12         | R87      | T91     | 113.67 |          |     |       |
| 13         | G86      | L90     | 78.19  |          |     |       |
| 14         | T4       | W6      | 21.26  |          |     |       |
| 15         | L89      | Q92     | 20.00  |          |     |       |
| 16         | R57      | V77     | 32.34  |          |     |       |
| 17         | T80      | V82     | 45.46  |          |     |       |
| 18         | G86      | L89     | 24.52  |          |     |       |
| Interchain |          |         |        |          |     |       |
| S. No.     | Chain A  | Chain B | Score  |          |     |       |
| 1          | T26      | T26     | 106.88 |          |     |       |
| 2          | T26      | D25     | 51.41  |          |     |       |
| 3          | L24      | T26     | 39.49  |          |     |       |
| 4          | D25      | T26     | 20.00  |          |     |       |
| 5          | H69      | F99     | 22.58  |          |     |       |
| 6          | L5       | C95     | 28.27  |          |     |       |
| 7          | T96      | N98     | 23.90  |          |     |       |
| 8          | W6       | I93     | 20.49  |          |     |       |
